# Supplementary material
Source: PubMed Central journal article supplement (PMC10524663)
Supplement: NIHMS1905513-supplement-1.pdf [file NIHMS1905513-supplement-1.pdf]

## **Supplementary Data**

Program planning staff and faculty of the workshop include the following:

Anas Abidin, Ph.D., NVIDIA

Theodore Abraham, M.D., UCSF American Society of Echocardiography

Sameer Antani, Ph.D., National Library of Medicine,

Charles Apgar, American College of Radiology (ACR)

Rima Arnaout, M.D., UCSF

Aldo Badano, Ph.D., Food and Drug Administration (FDA)

W. Patricia Bandettini, M.D., NHLBI

Lew Berman, Ph.D., M.S., NIH/Office of the Director

Ami Bhatt, M.D., American College of Cardiology (ACC)

Davis Bitton, M.S., Ambra Health

Stephen Browning, FDA

Anthony Chang, M.D., American Board of Artificial Intelligence in Medicine (ABAIM)

Melissa Chen, M.D., Anderson Cancer Center

Andy Crowne, Google Cloud Platform

Damini Dey, Ph.D., Cedars Sinai

Dennis Dean, Ph.D., Seven Bridges

Aneesh Deoras, M.S.E., FDA

Anne Docimo, M.D., M.B.A., UnitedHealth Group

Shawn Forrest, M.S., FDA

Steve Fu, AWS

Maryellen Giger, Ph.D., University of Chicago

David C. Goff, Jr., M.D., Ph.D., NHLBI

John Haller, Ph.D., NHLBI

Li-Yueh Hsu, D.Sc., NIH Clinical Center Radiology and Imaging Sciences

Lucy Hsu, Ph.D., NHLBI

Erin Iturriaga, D.N.P., M.S.N., R.N., NHLBI

Louis Jacques, M.D., ADVI, LLC, formerly of Centers for Medicare & Medicaid Services (CMS)

Krishna Kandarpa, M.D., Ph.D., National Institute of Biomedical Imaging and Bioengineering (NIBIB)

Sweta Ladwa, Ph.D., NHLBI

Jessica Lamb, Ph.D., FDA

Tim Leiner, M.D., Ph.D., Mayo Clinic

Huiqing Li, M.D., Ph.D., NHLBI

Joao Lima, M.D., Johns Hopkins University

Michael Lu, M.D., M.P.H., Massachusetts General Hospital

James Luo, Ph.D., NHLBI

Edward Margerrison, Ph.D., FDA

Manish Motwani, M.B., Ch.B., Ph.D., Manchester University, National Health Service

Wendy Nilsen, Ph.D., National Science Foundation

Peter Noseworthy, M.D., Mayo Clinic

Elaine Nsoesie, Ph.D., NIH Office of Data Science Strategy

David Ouyang, M.D., Cedars Sinai Medical Center

Steffen Petersen, M.D., Ph.D., Queen Mary University of London, Centre for Advanced Cardiovascular Imaging

Allison Pompey, Dr.Ph., M.A., CMS

Pranav Rajpurkar, Ph.D., Harvard Medical School

Rajesh Ranganath, Ph.D., New York University

R. Todd Reilly, Ph.D., NIH/Center for Information Technology, NIH STRIDES Initiative

Michael Rice, Microsoft

Travis Richardson, Flywheel

Christine Rutan, American Heart Association (AHA)

Vandana Sachdev, M.D., NHLBI

Ravi Samala, Ph.D., FDA

Partho Sengupta, M.D., Rutgers Robert Wood Johnson School of Medicine

Sanjiv Shah, M.D., Northwestern University

Sujata M. Shanbhag, M.D., M.P.H., NHLBI

Orlando Simonetti, Ph.D., Society for Cardiovascular Magnetic Resonance (SCMR)

Piotr Slomka, Ph.D., Cedars Sinai

Charles Stemple, M.D., M.B.A., formerly of Humana

Alastair Thomson, NHLBI

Natalia Trayanova, Ph.D., M.S., Johns Hopkins University

Wes Wiggins, M.S., AHA

Michelle Williams, M.B.Ch.B., Ph.D., B.Sc., University of Edinburgh

Pamela Woodard, M.D., ACR

Hui Xue, Ph.D., NHLBI
